# Supplementary material
Source: PubMed Central journal article supplement (PMC2528099)
Supplement: pp.108.120477_1.pdf [file pp.108.120477_1.pdf]

## Supplemental data

### Figure S1.

**prenylation and CaaX processing of proteins.** **I)** Prenylation involves the attachment of farnesyldiphosphate (FPP) and geranylgeranyldiphosphate (GGPP) prenyl group substrate to the free thiol group of CaaX box proteins. **II)** STE24 or RCE1 cleave the aaX residues off the prenylated proteins. **III)** ICMT methylates the free carboxyl group of the isoprenyl cysteine.

### Figure S2.

**Processing of the a mating factor precursor and the pheromone diffusion halo assay.**

**A)** The **a**-factor precursor is farnesylated by PFT and in turn Ste24 (and Rce1) cleave the 3 C-terminal residues (aaX=VIA). In turn, Ste14 methylates the isoprenyl cysteine, and Ste24 and Ste23/Axl1 cleave the protein to yield the mature **a**-factor (**B**), which is then secreted out of the cell. **C)** The pheromone diffusion halo assay is based upon arrest of  $\alpha$ -mating type cells by **a**-factor at the G1 stage of the cell cycle. *sst2 $\alpha$*  are **a**-factor hypersensitive mutant cells used in the halo assays. The size of the growth inhibition halo corresponds to the amount of secreted **a**-factor. No growth inhibition halos are formed around *ste24 $\Delta$  rce1 $\Delta$*  cells, which do not process and secrete the **a**-factor.

### Figure S3.

**Co-localization of AtSTE24, AtICMTA, AtRCE1 and AtICMTB in the ER following transient expression in *N. benthamiana* leaf epidermal cells.** **A-C)** Co-localization of YFP-AtSTE24 (**A**) and CFP-AtICMTA (**B**).

**D-F)** Co-localization of YFP-AtICMTA (**D**) and CFP-RCE1 (**E**). **A** and **D** YFP channel. **B** and **E** CFP channel. **C** and **F** YFP/CFP overlay. **G)** GFP-AtICMTB localization in the reticulate ER.. Bars are 10  $\mu$ m.

**Figure S4.**

**Expression pattern of *AtICMTA* and *AtICMTB*.** Microarray data from Genevestigator (Zimmermann et al., 2004; Laule et al., 2006) of expression levels of *AtICMTA* (red) and *AtICMTB* (blue) in different Arabidopsis tissues.

**Figure S5**

**Identification and analysis of an *AtICMTA* T-DNA insertion mutant.** **A)** Upper gel PCR on genomic DNA with T-DNA left border and *AtICMTA* gene-specific primer. Lower gel PCR on genomic DNA with *AtICMTA* gene specific primers. (+/+) WT plant, (-/-) T-DNA homozygote mutant plant and (+/-) heterozygote plant. **B)** RT-PCR on RNA isolated from *AticmtA*<sup>-/-</sup> mutant plants with *AtICMTA* or *AtICMTB* gene specific primers. Negative control – an RT-PCR reaction without RNA to verify lack of DNA contamination. The faint band in the faint band obtained with the *AtICMTA* primers is a result of low level amplification of *AtICMTB*.

**Figure S6.**

**Nucleotide sequence of *AtICMTA* highlighting the insertion site of the T-DNA.**

Purple letters – the coding sequence of the *AtICMTA*, red and blue letters SYP300 and SYP301 primers used for screening. Underline arrow additional primer used and arrowhead the T-DNA insertion site as determined by sequencing.

**Figure S7.**

**Nucleotide sequence alignment of *AtICMTA* and *AtICMTB*.** Green and orange, Blue and red arrows correspond to the gene-specific primers used to amplify *AtICMTA* and *AtICMTB*, respectively in RT-PCR reactions.

**Figure S8.**

**Amino acid sequence alignment of plant ICMT proteins.** Shown are ICMT sequences from poplar (A9PB59\_POPTR), Arabidopsis (AtICMTA, AtICMTB), rice (Os04g0602900, Q01SH5\_ORYSA, OsI016666, OsJ\_015369), *Physcomitrella patens* (A9SSC9\_PHYPA), human (HsICMTA) and *Saccharomyces cerevisiae* (Ste14). Yellow highlights identical amino acids in all the proteins, blue highlights identical amino acids in some of the proteins and greens highlights conserved amino acids. Red rectangles denote the residues that are conserved between AtICMTB, yeast Ste14, human and moss ICMT proteins and differ in AtICMTA.

**Table 1 – Oligonucleotide primers used in this study**

| Primer name | Sequence (5'-3')                                 | Restriction sites added | Used for                                                                            |
|-------------|--------------------------------------------------|-------------------------|-------------------------------------------------------------------------------------|
| SYP16       | GATGCTGTCGACACAGAGATCTTCAGTGAC<br>ACC            | SalI                    | Cloning ICMTA (F)                                                                   |
| SYP38       | ACGGGATCCATGACAGAGATATTTAGTG                     | XbaI                    | Cloning ICMTB (F)                                                                   |
| SYP39       | CACGTCGACTCAGTTTACAAAAGGAAC                      | SalI                    | Cloning ICMTB (R)                                                                   |
| SYP50       | GTGTGGCGGTTTTTTGCTGAGAGAATACCG<br>TACGAG         |                         | Point mutation ICMTA<br>Gln <sup>165</sup> to E (F)                                 |
| SYP51       | CTCGTACGGTATTCTCTCAGCAAAAAACCG<br>CCACAC         |                         | Point mutation ICMTA<br>Gln <sup>165</sup> to E (R)                                 |
| SYP52       | CAGTATCTAGAGTATGCACAGAGAGTTGCC<br>TCTGG          |                         | Point mutation ICMTA<br>Glu <sup>187</sup> and S <sup>188</sup> to R and Q<br>(F)   |
| SYP53       | CCAGAGGCAACTCTCTGTGCATACTCTAGA<br>TACTG          |                         | Point mutation ICMTA<br>Glu <sup>187</sup> and S <sup>188</sup> to R and Q<br>(R)   |
| SYP54       | GTTCACTCACCTCATAAAGATCCGCCGCGA<br>AGAGCATCACGGGC |                         | Point mutation ICMTA<br>Asn <sup>111</sup> and Tyr <sup>112</sup> to R and<br>R (F) |
| SYP55       | GCCCGTGATGCTCTTCGCGCGGATCTTTA<br>TGAGGTGAGTGAAC  |                         | Point mutation ICMTA<br>Asn <sup>111</sup> and Tyr <sup>112</sup> to R and<br>R (R) |
| SYP70       | GCCGAGCTCATGGCCACCGATGGCGAG                      | SacI                    | Cloning RCE1 (F)                                                                    |
| SYP71       | GCCGAGCTCTCAATTCCACAAAACAATAGC                   | SacI                    | Cloning RCE1 (R)                                                                    |
| SYP807      | GTGAGAGCTCATGACAGAGATCTTC                        | SacI                    | Cloning ICMTA with ATG<br>(F)                                                       |
| SYP808      | CACTGAGCTCTCAGTTCACAAATGG                        | SacI                    | Cloning ICMTA with stop<br>(R)                                                      |
| SYP300      | GGTTGGTGGGTTTTCTGTAAAATCTCAAT                    |                         | ICMTA F', used for<br>screening T-DNA insertion<br>mutants                          |
| SYP301      | CATATCCACGTCAAGACCTTCTCTTTTCAG                   |                         | ICMTA R', used for<br>screening T-DNA insertion<br>mutants                          |
| SYP304      | ACTCTCGAGGACAGAGATCTTCAGTGACAC                   | XhoI                    | ICMTA sense F' 380 bp<br>for RNAi                                                   |
| SYP305      | ACTCCATGGAGTCTATACACACCATGAGTC<br>A              | NcoI                    | ICMTA sense R' 380 bp<br>for RNAi                                                   |
| SYP306      | ACTTCTAGAGACAGAGATCTTCAGTGACAC                   | SacI                    | ICMTA antisense F' 380<br>bp for RNAi                                               |
| SYP307      | ACTGAGCTCAGTCTATACACACCATGAGTC<br>A              | XbaI                    | ICMTA antisense R' 380<br>bp for RNAi                                               |
| SYP321      | ATATGTTCAAAAATAATTCAAGTGTC                       |                         | Sequencing the T-DNA<br>insertion site in <i>ICMTA</i>                              |
| JL202       | CATTTTATAATAACGCTGCGGACATCTAC                    |                         | T-DNA-specific                                                                      |

|         |                            |                   |
|---------|----------------------------|-------------------|
| SYP322  | AGAGATCTTCAGTGACACCAGC     | ICMTA-F' specific |
| SYP323  | GTGTTTACCTTGTTGGTCTCCG     | ICMTA-R' specific |
| SYP324  | ATGACAGAGATATTTAGTGACACCGG | ICMTB-F' specific |
| SYP325  | AGTCAAATGTTTTCTTGTGGTCTTCC | ICMTB-R' specific |
| SYP1008 | AGCATCTCTCGTCTTCACAGC      | RCE1-F' - Q-PCR   |
| SYP1009 | CCACTCCTTGCCACAGATG        | RCE1-R' - Q-PCR   |
| SYP1006 | AATGATCATCGTTGGGGAAA       | ICMTA-F' - Q-PCR  |
| SYP1007 | AACGATCTCCCGCTGTTATT       | ICMTA-R' - Q-PCR  |
| SYP1004 | AAAGTCCACGCGATTCTCAC       | ICMTB-F' - Q-PCR  |
| SYP1005 | TCTGTCATTGAGTCTTCACAAGATTA | ICMTB-R' - Q-PCR  |
| SYP446  | CACTTTCCAGCAGATGTGGATC     | ACTIN8-F' - Q-PCR |
| SYP447  | AATGCCTGGACCTGCTTCAT       | ACTIN8 - Q-PCR    |

**Table 2. Plasmids used in this study**

| Plasmid Name | Description                                                                                                                                                                                                                                                                                               | Source or Reference                 |
|--------------|-----------------------------------------------------------------------------------------------------------------------------------------------------------------------------------------------------------------------------------------------------------------------------------------------------------|-------------------------------------|
| pJR1131      | Yeast low copy <i>CEN</i> shuttle vector containing a <i>URA3</i> marker, a glyceraldehydes-3-phosphate dehydrogenase gene ( <i>GPD</i> ) promoter and phosphoglycerate kinase gene ( <i>PGK</i> ) terminator, separated by restriction sites, Amp <sup>R</sup> gene and bacterial origin of replication. | (Yalovsky et al., 1997).            |
| pJR1133      | Yeast high copy 2 $\mu$ shuttle vector otherwise, identical to pJR1131.                                                                                                                                                                                                                                   | (Yalovsky et al., 1997)             |
| pJR1138      | Yeast high copy 2 $\mu$ shuttle vector containing a <i>LEU2</i> (instead of <i>URA3</i> ) marker otherwise, identical to pJR113                                                                                                                                                                           | (Yalovsky et al., 1997)             |
| pGFP-MRC     | 35S::GFP-NOS 3' end, Amp <sup>R</sup>                                                                                                                                                                                                                                                                     | (Rodriguez-Concepcion et al., 1999) |
| pCAMBIA 2300 | Plant TDNA-based binary vector, 35S promoter and NOS 3' end, Kan <sup>R</sup>                                                                                                                                                                                                                             | CAMBIA                              |
| pGEM         | PCR product TA cloning vector, Amp <sup>R</sup>                                                                                                                                                                                                                                                           | Promega                             |
| pSY24        | pJR1133-AtSTE24                                                                                                                                                                                                                                                                                           | (Bracha et al., 2002)               |
| pSY25        | pJR1131-AtSTE24                                                                                                                                                                                                                                                                                           | (Bracha et al., 2002)               |
| pSY27        | pCAMBIA 2300-GFP-AtSTE24                                                                                                                                                                                                                                                                                  | Present study                       |
| pSY28        | pCAMBIA 2300-GFP-AtICMTA                                                                                                                                                                                                                                                                                  | Present study                       |
| pSY31        | pJR1138 GFP-Atrop9/rac7mS                                                                                                                                                                                                                                                                                 | Present study                       |
| pSY32        | pJR1138 GFP-AtROP9/RAC7                                                                                                                                                                                                                                                                                   | Present study                       |
| pSY39        | pGFP-AtICMTA                                                                                                                                                                                                                                                                                              | Present study                       |
| pSY60        | pJR1133-AtICMTA                                                                                                                                                                                                                                                                                           | Present study                       |
| pSY64        | pCAMBIA2300-YFP- Atste24mA <sup>284</sup>                                                                                                                                                                                                                                                                 | Present study                       |
| pSY65        | pCAMBIA2300-GFP- Atste24mA <sup>284</sup>                                                                                                                                                                                                                                                                 | Present study                       |
| pSY66        | pCAMBIA2300-YFP-AtICMTA                                                                                                                                                                                                                                                                                   | Present study                       |
| pSY67        | pCAMBIA2300-CFP-AtICMTA                                                                                                                                                                                                                                                                                   | Present study                       |
| pSY68        | pCFP-AtICMTA                                                                                                                                                                                                                                                                                              | Present study                       |
| pSY69        | pYFP-AtICMTA                                                                                                                                                                                                                                                                                              | Present study                       |
| PSY87        | pPCRII-AtPCM/ICMTA                                                                                                                                                                                                                                                                                        | (Rodriguez-Concepcion et al., 2000) |
| pSY96        | pJR1133-AtICMTB                                                                                                                                                                                                                                                                                           | Present study                       |
| pSY98        | pJR1133-AtRCE1                                                                                                                                                                                                                                                                                            | Present study                       |
| pSY125       | pGEM AtRAC7                                                                                                                                                                                                                                                                                               | Present study                       |
| pSY900       | pJR1131-AtICMTB                                                                                                                                                                                                                                                                                           | Present Study                       |
| pSY901       | pJR1131-AticmtAmR <sup>111</sup> R <sup>112</sup> E <sup>165</sup>                                                                                                                                                                                                                                        | Present study                       |
| pSY902       | pJR1133-AticmtAmR <sup>111</sup> R <sup>112</sup> E <sup>165</sup>                                                                                                                                                                                                                                        | Present study                       |
| pSY903       | pJR1131-AticmtAmR <sup>154</sup> R <sup>155</sup> E <sup>165</sup> Q <sup>187</sup> R <sup>188</sup>                                                                                                                                                                                                      | Present study                       |
| pSY904       | pJR1133-AticmtAmR <sup>154</sup> R <sup>155</sup> E <sup>165</sup> Q <sup>187</sup> R <sup>188</sup>                                                                                                                                                                                                      | Present study                       |
| pSY905       | pCAMBIA2300-GFP-AtICMTB                                                                                                                                                                                                                                                                                   | Present study                       |
| pSY906       | pCAMBIA2300-CFP-AtICMTB                                                                                                                                                                                                                                                                                   | Present study                       |
| pSY907       | pCAMBIA2300-CFP- AtRCE1                                                                                                                                                                                                                                                                                   | Present study                       |
| pSY908       | pCAMBIA2300-GFP-AtRCE1                                                                                                                                                                                                                                                                                    | Present study                       |
| pSY915       | pJR1133-AticmtAmE <sup>165</sup>                                                                                                                                                                                                                                                                          | Present study                       |
| pSY302       | pGFP-MRC-AtICMTA-380 bp sense                                                                                                                                                                                                                                                                             | Present study                       |
| pSY303       | pGFP-MRC-dsAtICMTA-380 bp RNAi                                                                                                                                                                                                                                                                            | Present study                       |
| pSY304       | pCAMBIA2300-dsICMTA-RNAi-GFP                                                                                                                                                                                                                                                                              | Present study                       |
| pmCherry-ER  | mCherry-ER an ER marker plant binary vector                                                                                                                                                                                                                                                               | (Nelson et al., 2007)               |

**Table 3. Yeast strains used in this study**

| <b>Strain</b>      | <b>Genotype</b>                                                               | <b>Source or Reference</b> |
|--------------------|-------------------------------------------------------------------------------|----------------------------|
| JRY 6958           | <i>MATa his3 leu2 met15 ura3 pep4Δ::KanMX</i>                                 | (Trueblood et al., 2000)   |
| JRY 6959           | <i>MATa ste24Δ::HIS rce1Δ::TRP his3 leu2 lys2 met15 ura3</i>                  | (Trueblood et al., 2000)   |
| JRY 3443           | <i>MATα sst2 trp1 his3 ura3 can1</i>                                          | (Trueblood et al., 2000)   |
| 4246 <i>ste14Δ</i> | <i>MATa ste14Δ his3 leu2 lys2 trp1 ura3</i>                                   | Research Genetics          |
| SY Y 500           | <i>MATa ste24Δ::HIS rce1Δ::TRP his3 leu2 lys2 met15 ura3 + pSY24</i>          | Present study              |
| SY Y 501           | <i>MATa ste24Δ::HIS rce1Δ::TRP his3 leu2 lys2 met15 ura3 + pJR1133</i>        | Present study              |
| SY Y 502           | <i>MATa ste24Δ::HIS rce1Δ::TRP his3 leu2 lys2 met15 ura3 + pSY25</i>          | Present study              |
| SY Y 503           | <i>MATa ste24Δ::HIS rce1Δ::TRP his3 leu2 lys2 met15 ura3 + pJR1131</i>        | Present study              |
| SY Y 525           | <i>MATa ste14Δ his3 leu2 lys2 trp1 ura3 + pSY96</i>                           | Present study              |
| SY Y 526           | <i>MATa ste14Δ his3 leu2 lys2 trp1 ura3 + pSY60</i>                           | Present study              |
| SY Y 535           | <i>MATa ste24Δ::HIS rce1Δ::TRP his3 leu2 lys2 met15 ura3 + pSY 32 + pSY24</i> | Present study              |
| SY Y 538           | <i>MATa his3 leu2 met15 ura3 pep4Δ::KanMX + pSY32</i>                         | Present study              |
| SY Y 539           | <i>MATa his3 leu2 met15 ura3 pep4Δ::KanMX + pSY31</i>                         | Present study              |
| SY Y 542           | <i>MATa ste24Δ::HIS rce1Δ::TRP his3 leu2 lys2 met15 ura3 + pSY32</i>          | Present study              |
| SY Y 563           | <i>MATa ste24Δ::HIS rce1Δ::TRP his3 leu2 lys2 met15 ura3 + pSY98</i>          | Present study              |
| SY Y 564           | <i>MATa ste14Δ his3 leu2 lys2 trp1 ura3 + pSY96</i>                           | Present study              |
| SY Y 565           | <i>MATa ste14Δ his3 leu2 lys2 trp1 ura3 + pSY900</i>                          | Present study              |
| SY Y 569           | <i>MATa ste24Δ::HIS rce1Δ::TRP his3 leu2 lys2 met15 ura3 + pSY98 + pSY32</i>  | Present study              |
| SY Y 578           | <i>MATa ste14Δ his3 leu2 lys2 trp1 ura3 + pSY903</i>                          | Present study              |
| SY Y 579           | <i>MATa ste14Δ his3 leu2 lys2 trp1 ura3 + pSY904</i>                          | Present study              |

## Literature cited

**Bracha K, Lavy M, Yalovsky S** (2002) The Arabidopsis AtSTE24 is a CaaX protease with broad substrate specificity. *J. Biol. Chem.* **277**: 29856-29864

**Laule O, Hirsch-Hoffmann M, Hruz T, Gruissem W, Zimmermann P** (2006) Web-based analysis of the mouse transcriptome using Geneinvestigator. *BMC Bioinformatics* **7**: 311

**Nelson BK, Cai X, Nebenfuhr A** (2007) A multicolored set of in vivo organelle markers for co-localization studies in Arabidopsis and other plants. *Plant J* **51**: 1126-1136

- Rodriguez-Concepcion M, Toledo-Ortiz G, Yalovsky S, Caldelari D, GUISSEM W** (2000) Carboxyl-methylation of prenylated calmodulin CaM53 is required for efficient plasma membrane targeting of the protein. *Plant J.* **24**: 775-784.
- Rodriguez-Concepcion M, Yalovsky S, Zik M, Fromm H, GUISSEM W** (1999) The prenylation status of a novel plant calmodulin directs plasma membrane or nuclear localization of the protein. *Embo J.* **18**: 1996-2007.
- Trueblood CE, Boyartchuk VL, Picologlou EA, Rozema D, Poulter CD, Rine J** (2000) The CaaX proteases, Afc1p and Rce1p, have overlapping but distinct substrate specificities. *Mol Cell Biol* **20**: 4381-4392
- Yalovsky S, Trueblood CE, Callan KL, Narita JO, Jenkins SM, Rine J, GUISSEM W** (1997) Plant farnesyltransferase can restore yeast Ras signaling and mating. *Mol. Cell. Biol.* **17**: 1986-1994
- Zimmermann P, Hirsch-Hoffmann M, Hennig L, GUISSEM W** (2004) GENEVESTIGATOR. Arabidopsis microarray database and analysis toolbox. *Plant Physiol* **136**: 2621-2632



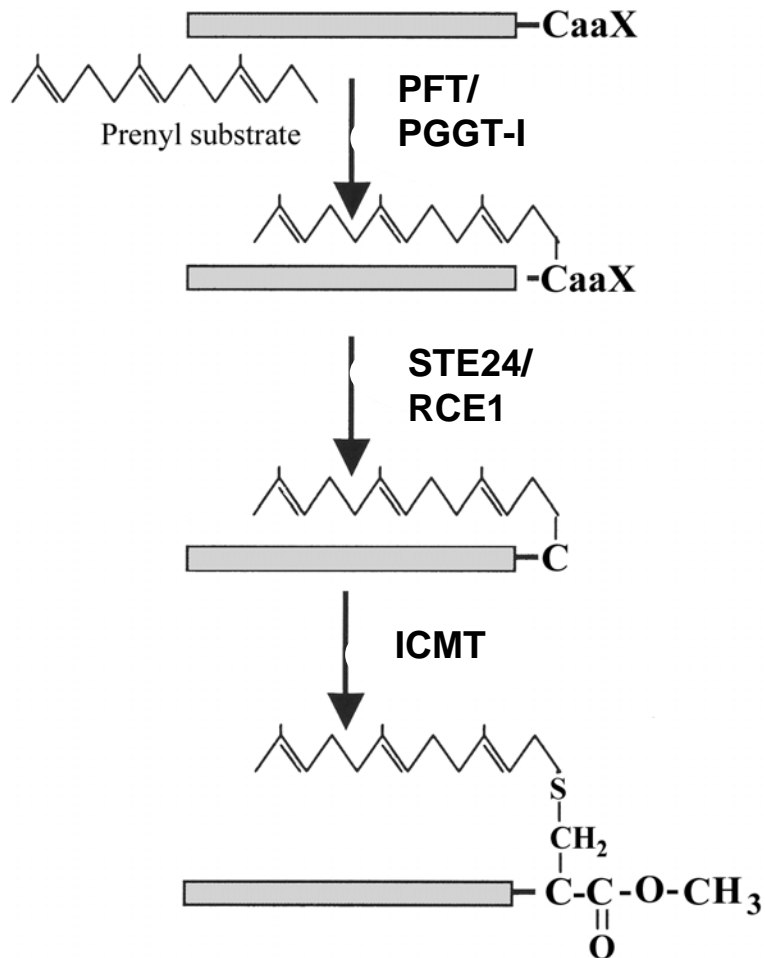

**Figure S1. prenylation and CaaX processing of proteins. I)**

Prenylation involves the attachment of farnesyl diphosphate (FPP) and geranylgeranyl diphosphate (GGPP) prenyl group substrate to the free thiol group of CaaX box proteins. II) STE24 or RCE1 cleave the aaX residues off the prenylated proteins. III) ICMT methylates the free carboxyl group of the isoprenyl cysteine.

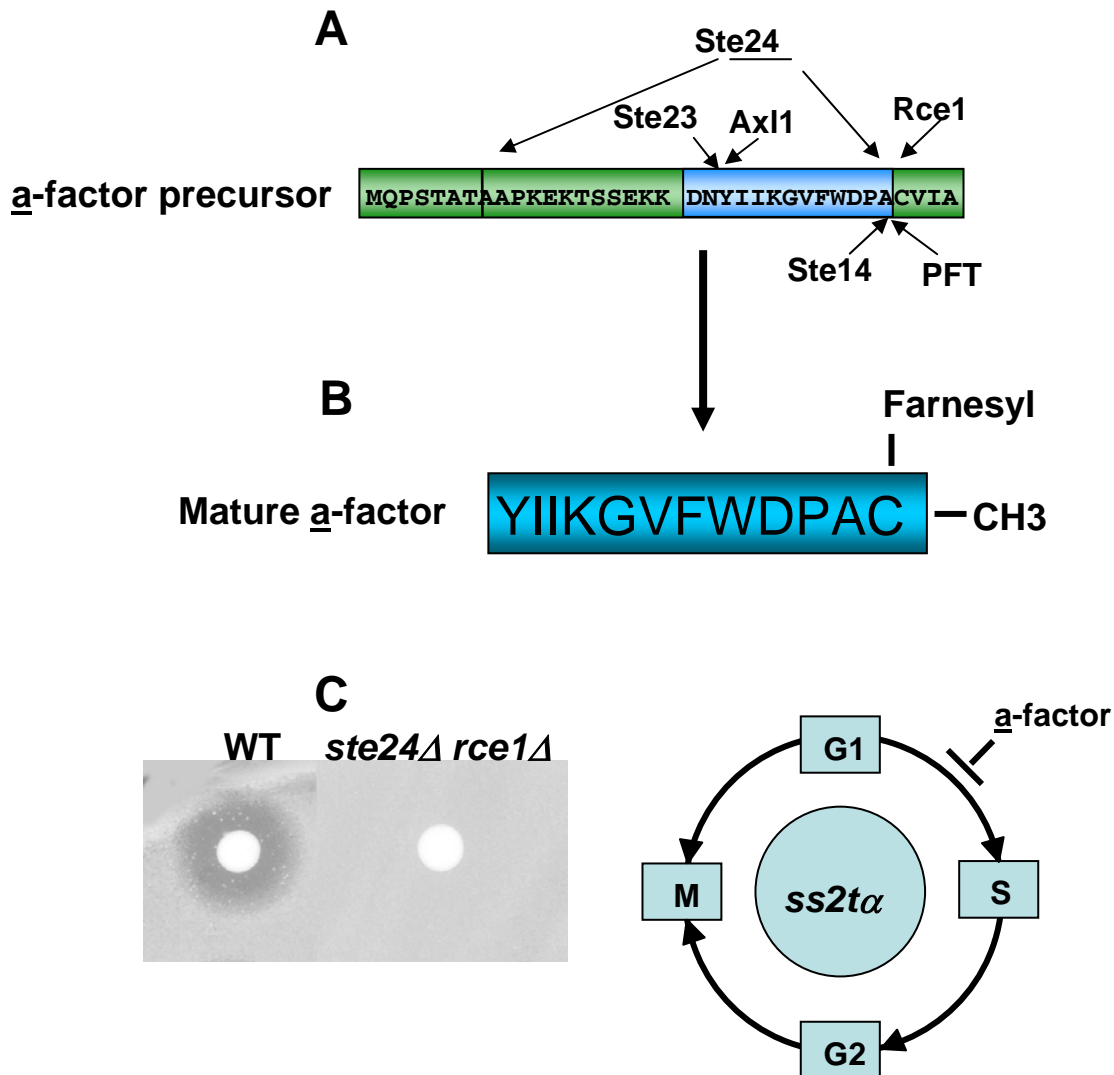

**Figure S2. Processing of the  $\alpha$  mating factor precursor and the pheromone diffusion halo assay.** **A)** The  $\alpha$ -factor precursor is farnesylated by PFT and in turn Ste24 (and Rce1) cleave the 3 C-terminal residues (aaX=VIA). In turn, Ste14 methylates the isoprenyl cysteine, and Ste24 and Ste23/Axl1 cleave the protein to yield the mature  $\alpha$ -factor (**B**), which is then secreted out of the cell. **C)** The pheromone diffusion halo assay is based upon arrest of  $\alpha$ -mating type cells by  $\alpha$ -factor at the G1 stage of the cell cycle. *ss2t $\alpha$*  are  $\alpha$ -factor hypersensitive mutant cells used in the halo assays. The size of the growth inhibition halo corresponds to the amount of secreted  $\alpha$ -factor. No growth inhibition halos are formed around *ste24 $\Delta$  rce1 $\Delta$*  cells, which do not process and secrete the  $\alpha$ -factor.

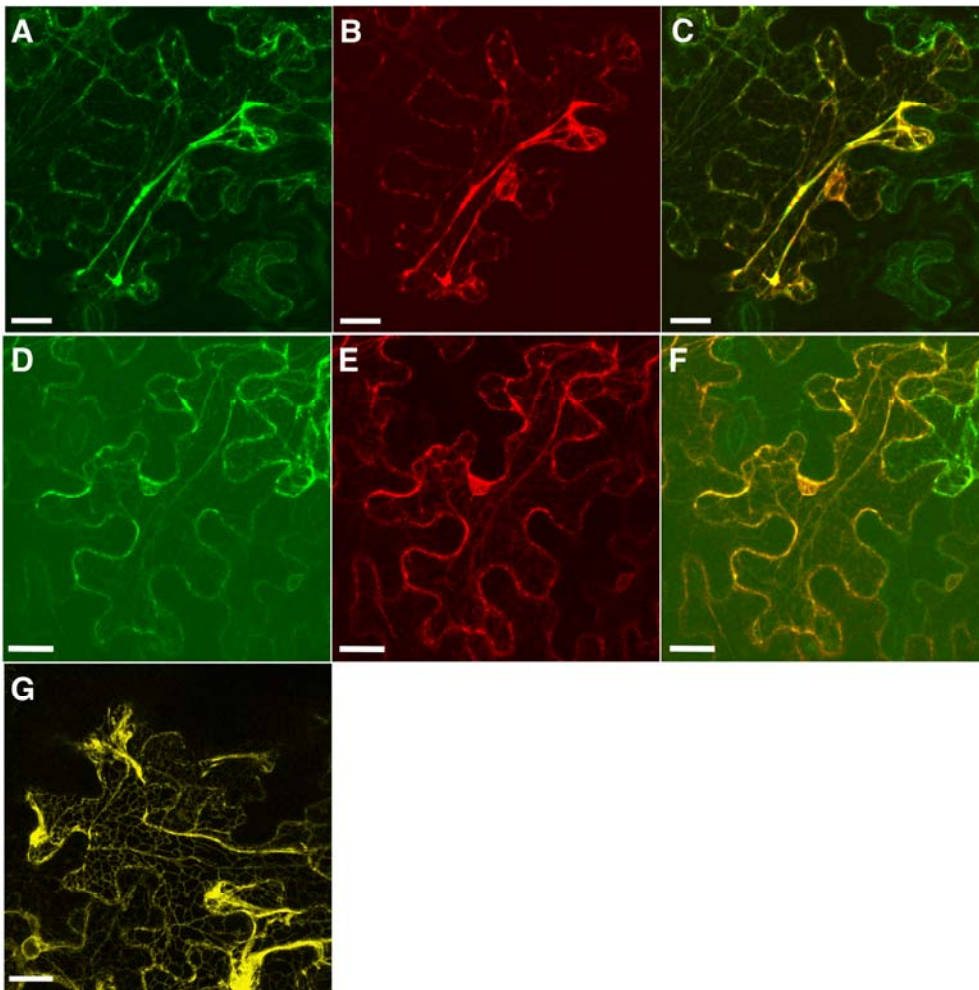

**Figure S3.**

**Co-localization of AtSTE24, AtICMTA, AtRCE1 and AtICMTB in the ER following transient expression in *N. benthamiana* leaf epidermal cells. A-C) Co-localization of YFP-AtSTE24 (A) and CFP-AtICMTA (B). D-F) Co-localization of YFP-AtICMTA (D) and CFP-RCE1 (E). A and D YFP channel. B and E CFP channel. C and F YFP/CFP overlay. G) GFP-AtICMTB localization in the reticulate ER. Bars are 10  $\mu$ m.**

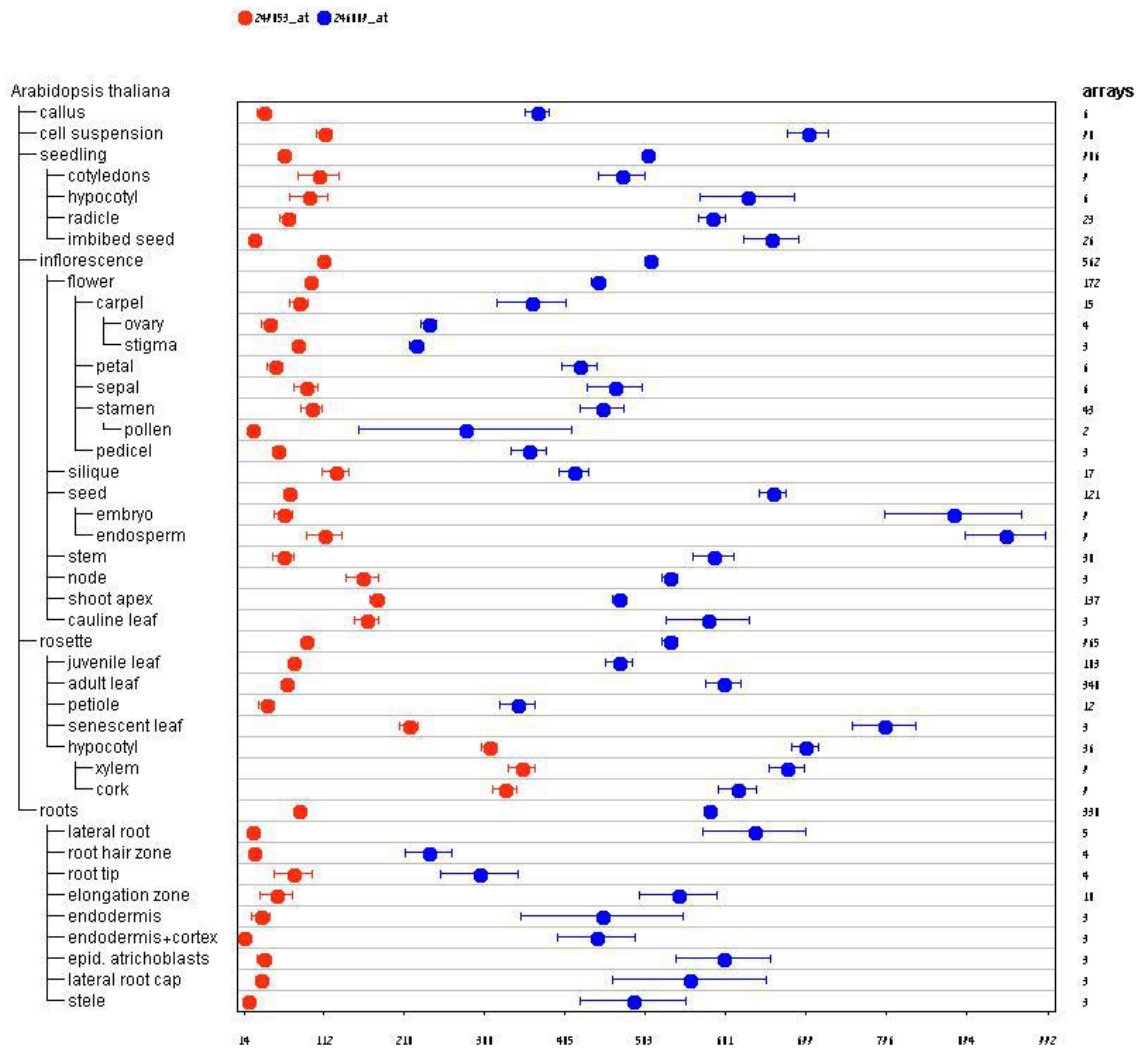

**Figure S4.** Expression pattern of *AtCMTA* and *AtCMTB*. Microarray data from Genevestigator (Zimmermann et al., 2004; Laule et al., 2006) of expression levels of *AtCMTA* (red) and *AtCMTB* (blue) in different *Arabidopsis* tissues.

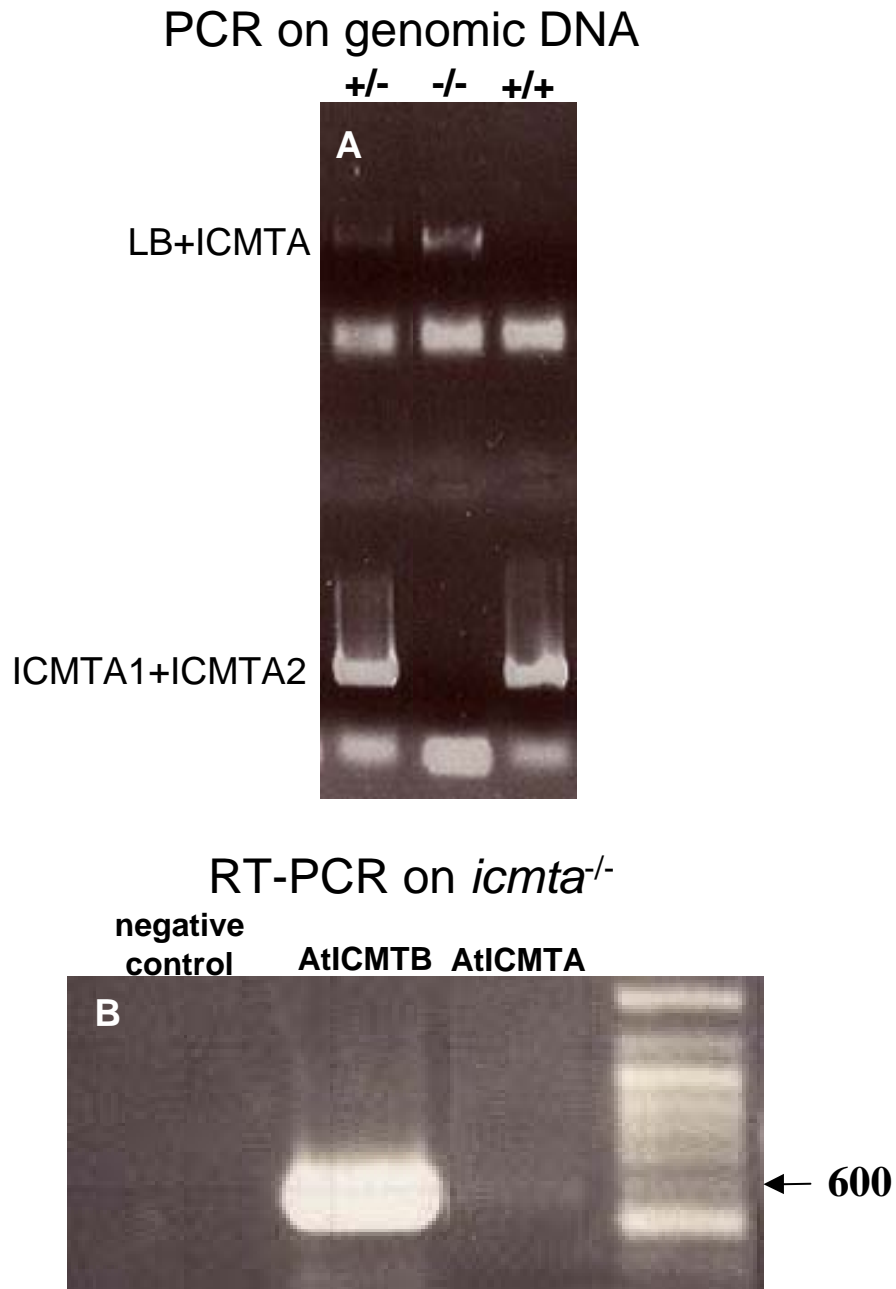

**Figure S5.**

**Identification and analysis of an *AtICMTA* T-DNA insertion mutant.** **A)** Upper gel PCR on genomic DNA with T-DNA left border and *AtICMTA* gene-specific primer. Lower gel PCR on genomic DNA with *AtICMTA* gene specific primers. (**+/+**) Wild type plant, (**-/-**) T-DNA homozygote mutant plant and (**+/-**) heterozygote plant. **B)** RT-PCR on RNA isolated from *AticmtA*<sup>-/-</sup> mutant plants with *AtICMTA* or *AtICMTB* gene specific primers. Negative control – an RT-PCR reaction without RNA to verify lack of DNA contamination. The faint band in the faint band obtained with the *AtICMTA* primers is a result of low level amplification of *AtICMTB*.

64021 aaactgcaa tgcgattggt gtgttg<sup>▶</sup>gttg gtgggttttc tgtaaaatct caatggtcat  
 64081 gtaggacctg ggttttggca gattcagtgc cataaagact gtagtgtag tctcatatt  
 64141 acatttgat ggttgctaaa tggtaaaact gatactagta taactcagag attacaagat  
 64201 ttatttggat caagatcata tgttccttg atgcccacaaac taattcattg ttaagattca  
 64261 taaaatcgag tatatagcga gtaaacgttt acttgaattt cctcgttctt tacccttgt  
 64321 aggagggtat gcagttcttg gatcccctga gatttgtgt caaaaaccag ctccattac  
 64381 tgatacacta tgcctcctg tcattctcag gtctgttga gttcttgaac caaattatca  
 64441 taagcttga tcaaacagga aagaaaacct ctataatct ttcttgattg ataaaaatga  
 64501 cagagatctt cagtacacc agcatcagac agttatctca aatgctacta tcactaatct  
 64561 tctccacat atccgaatac attctagcca tcaccattca cggagcatca aacgtaactc  
 64621 ttagtctct ttaatacacc aagcattacg cttagcaat gcttctgtcg ctctcgaat  
 64681 acctaecgga gattatctc tcccggggc tgaacaaca ctggggggtc agcaacttg  
 64741 gactcataat gatcatcgtt ggggaaatca tcaggaagc agcgataata acagcgggaa  
 64801 gatcgtcac tcacctata aagatcaact acgaagagca tcacgggctt gtgactcatg  
 64861 gtgtgatag actaatgagg catccaagt actgcggtt tctcatctgg tggctcggga  
 64921 cacaagttat gctctgtaac cccgttctcag cagtgcggt cgcggttgc gtgtggcggt  
 64981 ttttctca gagaataccg tacgaggagt atttctgaa tcagttttt ggggtacagt  
 65041 atctagagta tgcagagagt gttgctctg gtgttcatt tgtgaactga cactgaatt  
 65101 attttgaac atatgagttt gatgtacttg acttgaggtc ttaaagtcac aaaaacatac  
 65161 aagacctct **ggctgaaaga gaaggtcttg acgtggatat** g<sup>◀</sup>aaattacc acagcgttaa  
 65221 ttgttatgt gacacctgc accggtgatg catagctccg gcgaagagtt tcggagaaca

**Figure S6.**

**Nucleotide sequence of AtICMTA highlighting the insertion site of the T-DNA.** Purple letters – the coding sequence of the AtICMTA, red and blue letters SYP300 and SYP301 primers used for screening. Underline arrow additional primer used and arrowhead the T-DNA insertion site as determined by sequence.

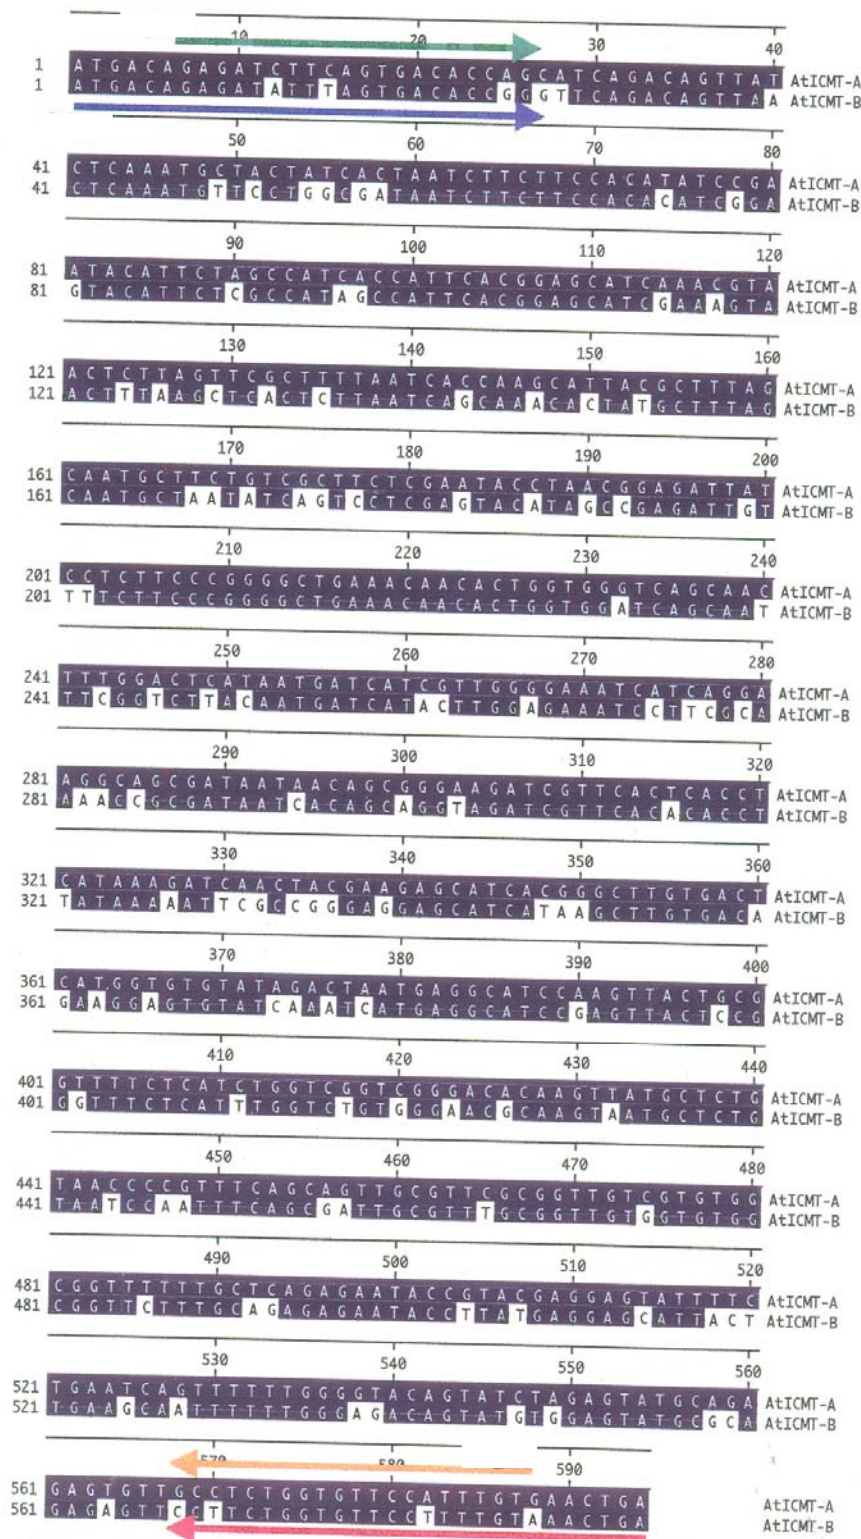

**Figure S7.**  
**Nucleotide sequence alignment of AtICMTA and AtICMTB.** Green and orange,  
 Blue and red arrows correspond to the gene-specific primers used to amplify  
*AtICMTA* and *AtICMTB*, respectively in RT-PCR reactions.



|              | Section 1 |                                 |                            |                            |                            |                 |          |
|--------------|-----------|---------------------------------|----------------------------|----------------------------|----------------------------|-----------------|----------|
|              | (1)       | 10                              | 20                         | 30                         | 40                         | 53              |          |
| A9PB59_POPTR | (1)       | -----                           | -----                      | -----                      | -----                      | -----           |          |
| ICMTA        | (1)       | -----                           | -----                      | -----                      | -----                      | -----           |          |
| ICMTB        | (1)       | -----                           | -----                      | -----                      | -----                      | -----           |          |
| Os04g0602900 | (1)       | -----                           | -----                      | -----                      | -----                      | -----           |          |
| Q01H55_ORYSA | (1)       | -----                           | -----                      | -----                      | -----                      | -----           |          |
| OsI_016666   | (1)       | -----                           | -----                      | -----                      | -----                      | -----           |          |
| OsI_015369   | (1)       | -----                           | -----                      | -----                      | -----                      | -----           |          |
| A9SSC9_PHYPA | (1)       | -----                           | -----                      | -----                      | -----                      | -----           |          |
| HsICMTA      | (1)       | MAGCAARAPP                      | GSEARLSLATFLLGASV          | LALPLLTRAGLQ               | GRRTGLALYV                 | AGLMA           |          |
| STE14        | (1)       | -----                           | -----                      | -----                      | -----                      | MHQDFQEDFH      |          |
|              | Section 2 |                                 |                            |                            |                            |                 |          |
|              | (54)      | 60                              | 70                         | 80                         | 90                         | 106             |          |
| A9PB59_POPTR | (1)       | -----                           | -----                      | -----                      | MTEIFGYTACRQLSQMFLAWLFFHSS | -----           |          |
| ICMTA        | (1)       | -----                           | -----                      | -----                      | MTEIFSDTIRQLSQMLLGLLFFHIS  | -----           |          |
| ICMTB        | (1)       | -----                           | -----                      | -----                      | MTEIFSDTGFRLTQMFLALTFPHTS  | -----           |          |
| Os04g0602900 | (1)       | -----                           | -----                      | -----                      | -----                      | -----           |          |
| Q01H55_ORYSA | (1)       | -----                           | -----                      | -----                      | MAARAQAWLFAAALVIFPHGS      | -----           |          |
| OsI_016666   | (1)       | -----                           | -----                      | -----                      | MAARAQAWLFAAALVIFPHGS      | -----           |          |
| OsI_015369   | (1)       | -----                           | -----                      | -----                      | MAARAQAWLFAAALVIFPHGS      | -----           |          |
| A9SSC9_PHYPA | (1)       | -----                           | -----                      | -----                      | MGFTPWEQLQWMFGAVVFFHST     | -----           |          |
| HsICMTA      | (54)      | LLLLLYRPPRYQIAIRACFLGFVFGCGTLLS | FSQSSWSHFGVYMC             | SLSLFHS                    | -----                      | -----           |          |
| STE14        | (11)      | EYDPDIRRNPLHEVMTSYILGILLG-IFVGL | FPOIRFK                    | NFNLII                     | ALLSLPHFL                  | -----           |          |
|              | Section 3 |                                 |                            |                            |                            |                 |          |
|              | (107)     | 120                             | 130                        | 140                        | 159                        |                 |          |
| A9PB59_POPTR | (27)      | EYVIVAAIHGR-S                   | SVNLSLLISKAV               | WFAMFALLEY                 | WVIAIFPGLKEYWV             | -----           |          |
| ICMTA        | (27)      | EYVLAATTIHGA-S                  | NVTLSSLLITRHYALANLLSLEYL   | TEILFFPGLKQHWV             | -----                      | -----           |          |
| ICMTB        | (27)      | EYVLAATTIHGA-S                  | KWTLSSLLISKHYALANLISVLEYL  | AEIYFFPGLKQHWV             | -----                      | -----           |          |
| Os04g0602900 | (1)       | -----                           | SRALLISKQYV                | LAMSFANLEHLTEALLFPPELKEYWF | -----                      | -----           |          |
| Q01H55_ORYSA | (21)      | EYVLAAAFHGR-R                   | NVTATSSLLISKQYV            | LAMSFANLEHLTEALLFPPELKEYWF | -----                      | -----           |          |
| OsI_016666   | (21)      | EYVLAAAFHGR-R                   | NVTATSSLLISKQYV            | LAMSFANLEHLTEALLFPPELKEYWF | -----                      | -----           |          |
| OsI_015369   | (21)      | EYVLAAAFHGR-R                   | NVTATSSLLISKQYV            | LAMSFANLEHLTEALLFPPELKEYWF | -----                      | -----           |          |
| A9SSC9_PHYPA | (23)      | EFLALAYHGR-RR                   | VNAASTLISVPLIALGVSLVEHALES | WFAPULKQAY                 | -----                      | -----           |          |
| HsICMTA      | (107)     | EYLYTAVNNPKSLSDS                | FLNHSLEYTAAALS             | WLEFTELENF                 | FPPELKQITV                 | -----           |          |
| STE14        | (63)      | EYVITAKINPLKVHSE                | FLNNGKSYMAAH               | SFALECLVES                 | FPPDLKIN                   | STIS            |          |
|              | Section 4 |                                 |                            |                            |                            |                 |          |
|              | (160)     | 170                             | 180                        | 190                        | 200                        | 212             |          |
| A9PB59_POPTR | (78)      | -----                           | VSNLGLVMVVI                | GETRKLAV                   | VTAGQSFTHLIKVM             | MEEQHMLITHGVYR  |          |
| ICMTA        | (78)      | -----                           | VSNFGLMHIIV                | GETIRKALIT                 | AGRSFTHLIKVM               | MEEQHMLITHGVYR  |          |
| ICMTB        | (78)      | -----                           | VSNFGLMHIIV                | GETIRKALIT                 | AGRSFTHLIKVM               | RRREQHMLITHGVYR |          |
| Os04g0602900 | (37)      | -----                           | VSYVGLVMVVI                | GEVIRKLA                   | VVTAGRSFTHVIR              | HYEDQHKLITHGVYR |          |
| Q01H55_ORYSA | (72)      | -----                           | VSYVGLVMVVI                | GEVIRKLA                   | VVTAGRSFTHVIR              | HYEDQHKLITHGVYR |          |
| OsI_016666   | (72)      | -----                           | VSYVGLVMVVI                | GEVIRKLA                   | VVTAGRSFTHVIR              | HYEDQHKLITHGVYR |          |
| OsI_015369   | (72)      | -----                           | VSYVGLVMVVI                | GEVIRKLA                   | VVTAGRSFTHVIR              | HYEDQHKLITHGVYR |          |
| A9SSC9_PHYPA | (74)      | -----                           | LSYTG                      | LAMVWVGD                   | SRKLA                      | VVTANKSFTHD     | IKVEREQE |
| HsICMTA      | (159)     | -----                           | LSWTGLMVF                  | GCECLREAA                  | FTAGSNFNHV                 | WQERKSD         |          |
| STE14        | (116)     | LATKLC                          | VVIGCLLVIV                 | IGQYTRT                    | LAHMTAGHS                  | FSHIKTKKESD     |          |
|              | Section 5 |                                 |                            |                            |                            |                 |          |
|              | (213)     | 220                             | 230                        | 240                        | 250                        | 265             |          |
| A9PB59_POPTR | (126)     | FVRHPSYLG                       | FLLIWSVGTQ                 | MLSNP                      | ISTIGFALV                  | WVWRFFS         |          |
| ICMTA        | (126)     | LMRHPSYCG                       | FLLIWSVGTQ                 | VMLCN                      | PWSAVAF                    | VWVWRFFS        |          |
| ICMTB        | (126)     | LMRHPSYSG                       | FLLIWSVGTQ                 | VMLCN                      | PISAF                      | VWVWRFFS        |          |
| Os04g0602900 | (85)      | LMRHPGYS                        | GFLIWSVGTQ                 | VMLCN                      | PLSTV                      | FTLVWVWRFFS     |          |
| Q01H55_ORYSA | (120)     | LMRHPGYS                        | GFLIWSVGTQ                 | VMLCN                      | PLSTV                      | FTLVWVWRFFS     |          |
| OsI_016666   | (120)     | LMRHPGYS                        | GFLIWSVGTQ                 | VS-CF--                    | IFVWVIPS                   | LKTR--          |          |
| OsI_015369   | (120)     | LMRHPGYS                        | GFLIWSVGTQ                 | VS-CF--                    | IFVWVIPS                   | LKTR--          |          |
| A9SSC9_PHYPA | (122)     | FFRHPSYLG                       | FFWWSIGTQ                  | VLLVMP                     | ICIVGYTL                   | WTRFFF          |          |
| HsICMTA      | (207)     | WFRHPSYV                        | GFYWSIGTQ                  | VMLCN                      | PLCGV                      | SALVWVWRFFS     |          |
| STE14        | (169)     | WSRHPSYLG                       | FFWWSIGTQ                  | VLLVMP                     | ICIVGYTL                   | WTRFFF          |          |
|              | Section 6 |                                 |                            |                            |                            |                 |          |
|              | (266)     | 280                             | 290                        |                            |                            |                 |          |
| A9PB59_POPTR | (179)     | GSEYVEY                         | SKTPSG                     | WPFVK                      | -----                      |                 |          |
| ICMTA        | (179)     | GVQVLEY                         | ESASG                      | WPFVN                      | -----                      |                 |          |
| ICMTB        | (179)     | GRQVLEY                         | QRPSG                      | WPFVN                      | -----                      |                 |          |
| Os04g0602900 | (138)     | GREYVEY                         | QKHS                       | GLPFIE                     | -----                      |                 |          |
| Q01H55_ORYSA | (173)     | GREYVEY                         | QKHS                       | GLPFIE                     | -----                      |                 |          |
| OsI_016666   | (168)     | GLNMM                           | -----                      | -----                      | -----                      |                 |          |
| OsI_015369   | (168)     | GLNMM                           | -----                      | -----                      | -----                      |                 |          |
| A9SSC9_PHYPA | (175)     | QQD                             | VVDY                       | SRPSG                      | WPFVK                      |                 |          |
| HsICMTA      | (260)     | GSEYVEY                         | KRPT                       | GLPF                       | IKGVKVDL                   |                 |          |
| STE14        | (222)     | SAEYVEY                         | NK                         | GVG                        | LPFI                       |                 |          |
